# Supplementary material for: Gestational arsenic exposure induces site-specific DNA hypomethylation in active retrotransposon subfamilies in offspring sperm in mice
Source: PubMed Central journal article supplement (PMC7709384; doi:10.1186/s13072-020-00375-3), 2020-12-02
Supplement: 13072_2020_375_MOESM1_ESM.pdf [file 13072_2020_375_MOESM1_ESM.pdf]

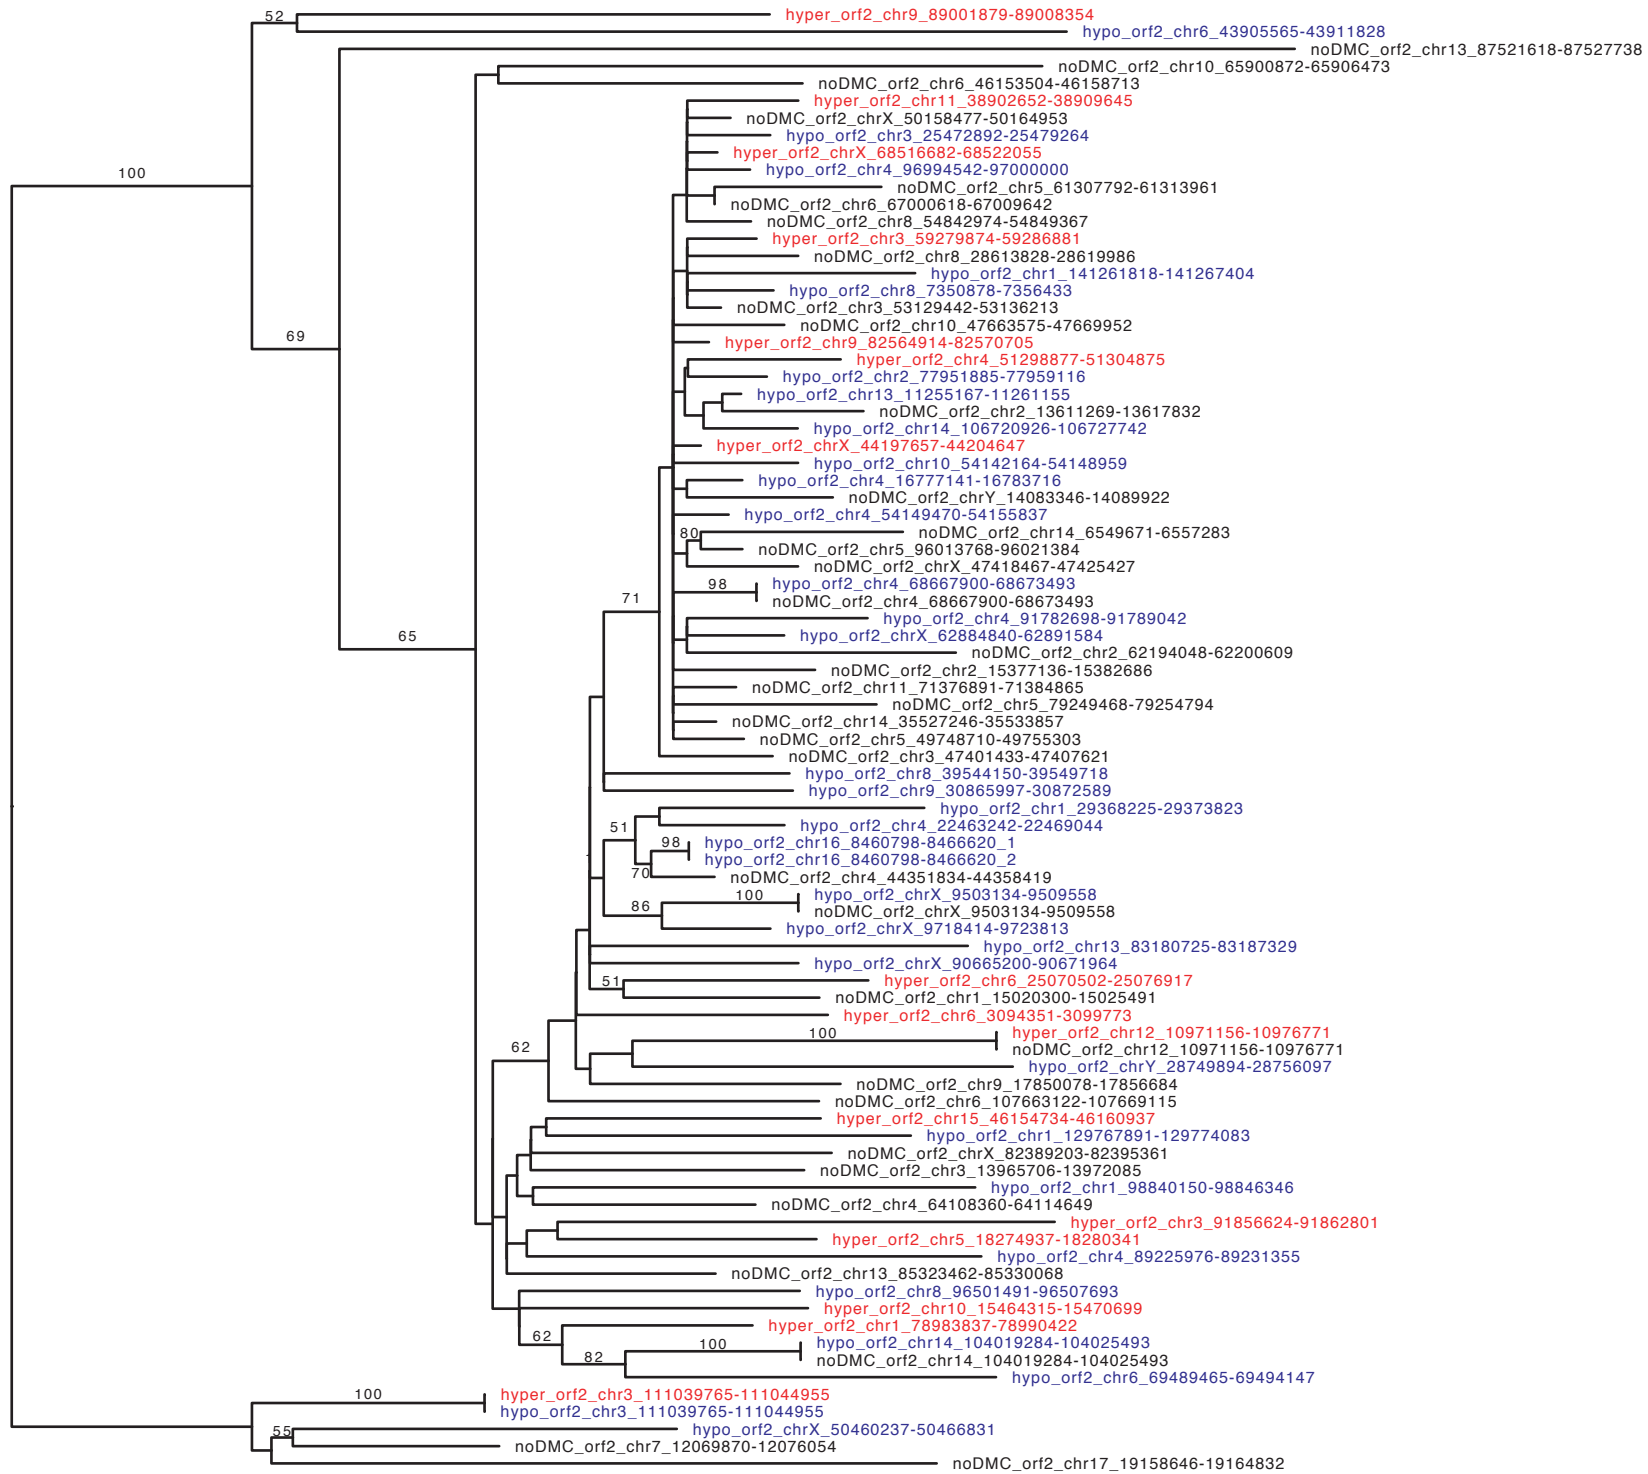

0.0030
