# Supplementary material for: Gestational arsenic exposure induces site-specific DNA hypomethylation in active retrotransposon subfamilies in offspring sperm in mice
Source: PubMed Central journal article supplement (PMC7709384; doi:10.1186/s13072-020-00375-3), 2020-12-02
Supplement: 13072_2020_375_MOESM2_ESM.pdf [file 13072_2020_375_MOESM2_ESM.pdf]

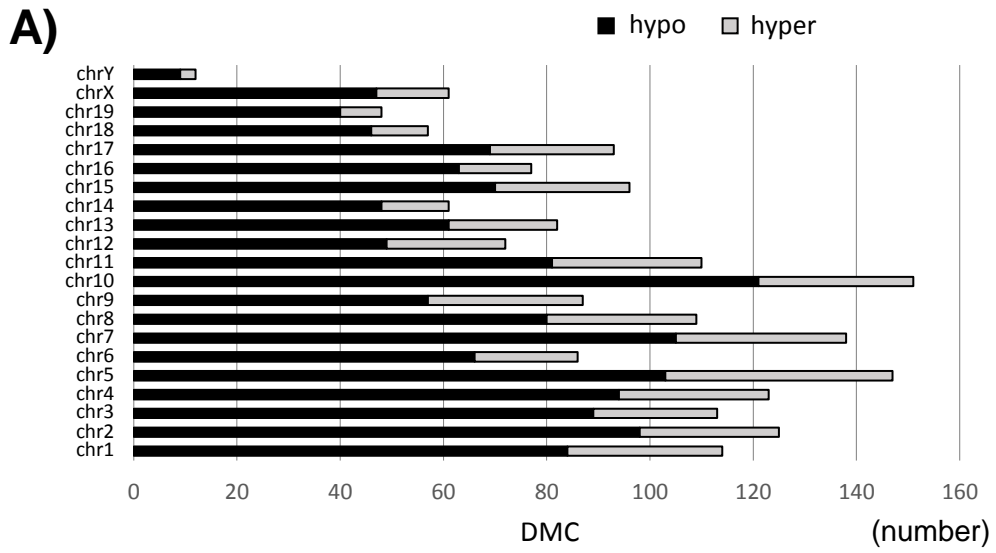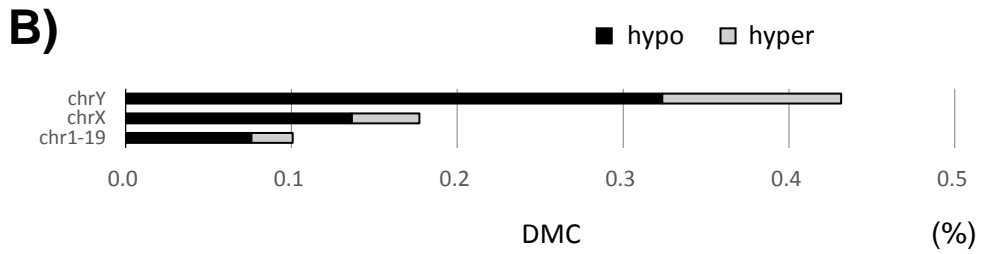

Figure S1.

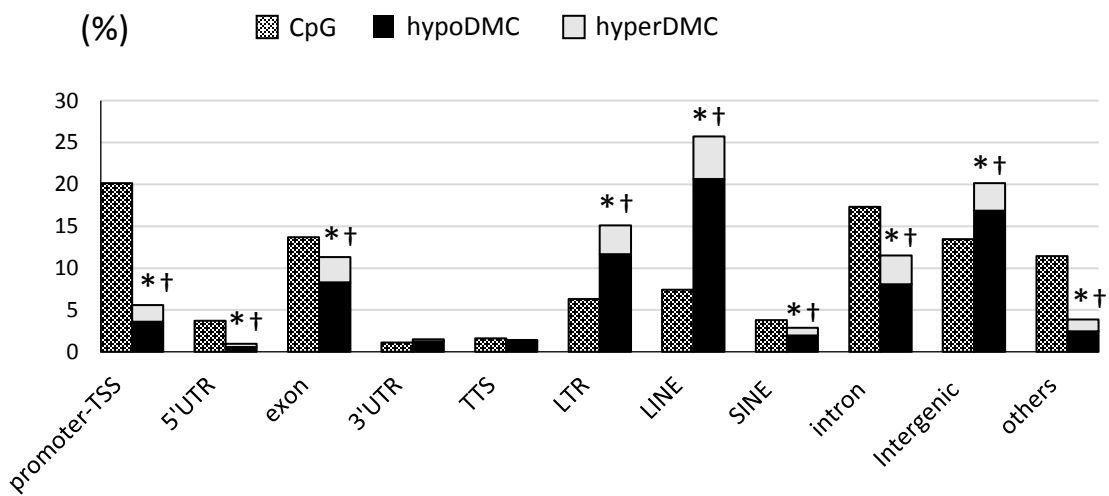

Figure S2.

**A)**

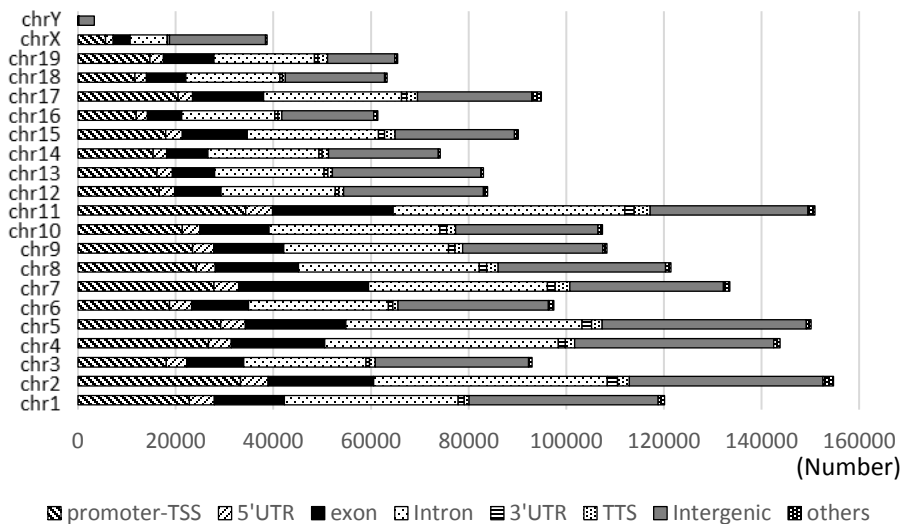

**B)**

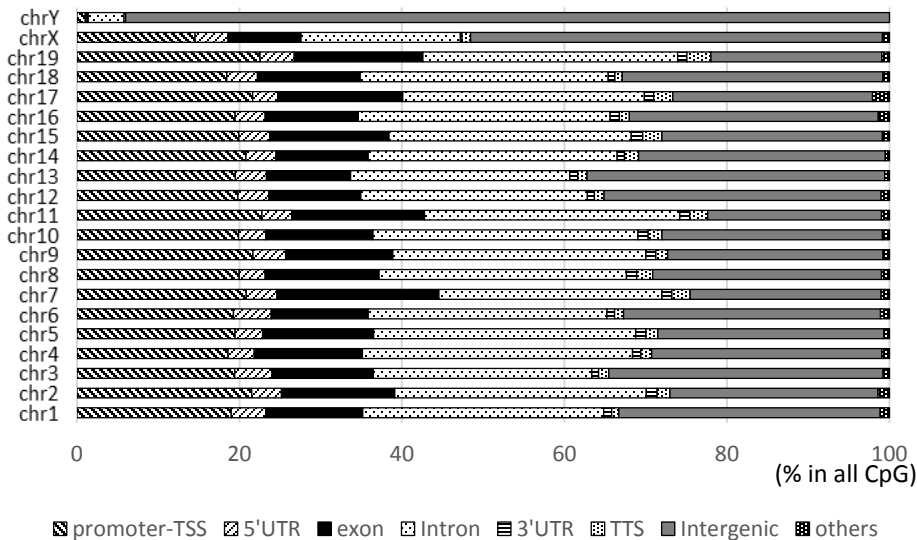

Figure S5.

**A) Gpr1/zdbf2**

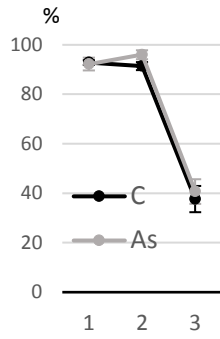

**B) H19 ICR**

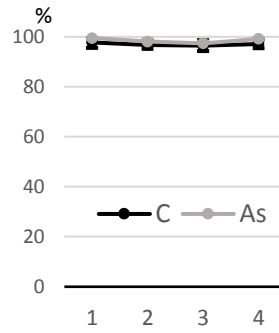

**C) Rasgrf1**

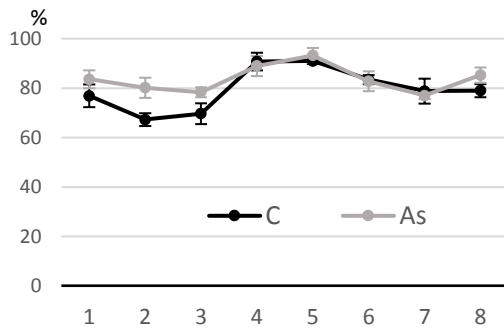

**D) DLK-Gtl2 IG**

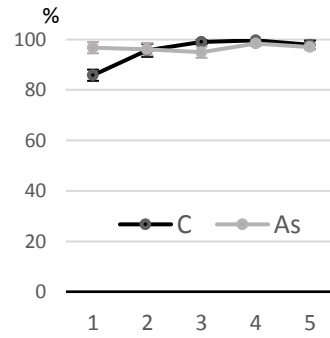

Figure S6.

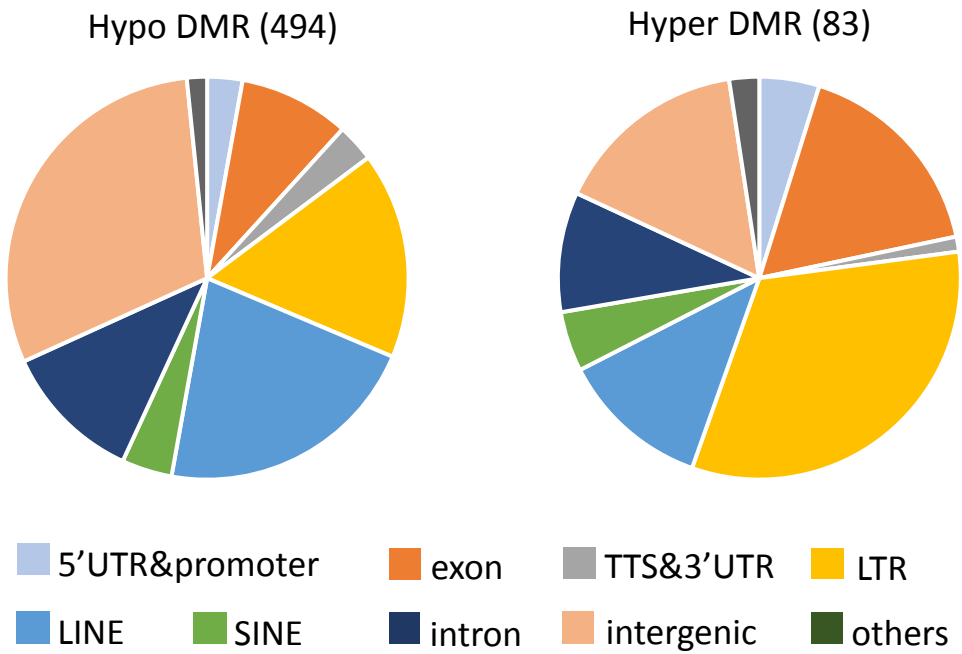

Figure S7.

Table S1. The annotation and detailed annotation used by HOMER

A) The priority of annotation by HOMER<sup>a)</sup>

|   |                                               |
|---|-----------------------------------------------|
| 1 | TSS (by default defined from -1kb to +100bp)  |
| 2 | TTS (by default defined from -100 bp to +1kb) |
| 3 | CDS Exons                                     |
| 4 | 5' UTR Exons                                  |
| 5 | 3' UTR Exons                                  |
| 6 | CpG Islands                                   |
| 7 | Repeats                                       |
| 8 | Introns                                       |
| 9 | Intergenic                                    |

a) Referred from <http://homer.ucsd.edu/homer/ngs/annotation.html>

B) The annotation and detailed annotation used in the present study

| Annotation   | Detailed annotation |              |                    |
|--------------|---------------------|--------------|--------------------|
|              | Category 1          | Category 2   |                    |
| Fig. 2A      | Fig. 3A             | Fig. 4A, 5A  | Fig. 6             |
| Promoter-TSS | Promoter-TSS        | Promoter-TSS | Promoter-TSS+5'UTR |
| 5'UTR        | 5'UTR               | 5'UTR        |                    |
| Exon         | Exon                | Exon         | Exon               |
| Intron       | LTR                 | IAPE         | IAPE               |
|              |                     | IAPLTR       | Other LTRs         |
|              |                     | MMERVK       |                    |
|              |                     | MT           |                    |
|              |                     | RLTR         |                    |
|              |                     | RMER         |                    |
|              |                     | LTR others   |                    |
|              | LINE                | L1Md_A       | L1Md_A             |
|              |                     | L1Md_F       | L1Md_F             |
|              |                     | L1Md_T       | L1Md_T             |
|              |                     | L1M other    | Other LINES        |
|              |                     | L1 other     |                    |
|              | LINE others         |              |                    |
|              | SINE                | SINE         | SINE               |
| Intron       | Intron              | Intron       |                    |
| Others       | Others              | Others       |                    |
| 3'UTR        | 3'UTR               | 3'UTR        | TTS + 3'UTR        |
| TTS          | TTS                 | TTS          |                    |
| Intergenic   | LTR                 | IAPE         | IAPE               |
|              |                     | IAPLTR       | Other LTRs         |
|              |                     | MMERVK       |                    |
|              |                     | MT           |                    |
|              |                     | RLTR         |                    |
|              |                     | RMER         |                    |
|              |                     | LTR others   |                    |
|              | LINE                | L1Md_A       | L1Md_A             |
|              |                     | L1Md_F       | L1Md_F             |
|              |                     | L1Md_T       | L1Md_T             |
|              |                     | L1M other    | Other L1           |
|              |                     | L1 other     |                    |
|              | LINE others         |              |                    |
|              | SINE                | SINE         | SINE               |
| Intergenic   | Intergenic          | Intergenic   |                    |
| Others       | Others              | Others       |                    |
| Others       | Others              | Others       | Others             |

Table S2. DMRs at TSS  $\pm$  2,000 bp

| Chr      | Start     | End       | Gene Name     | Mean meth diff | # of CpGs | # of DMCs | Width | True distance |
|----------|-----------|-----------|---------------|----------------|-----------|-----------|-------|---------------|
| HypoDMC  |           |           |               |                |           |           |       |               |
| chr2     | 180227845 | 180227956 | Lama5         | -15.5          | 8         | 1         | 113   | -1987         |
| chr7     | 19406056  | 19406242  | Klc3          | -10.4          | 12        | 1         | 188   | -1953         |
| chr17    | 46784507  | 46784638  | Rpl7l1        | -15.2          | 9         | 1         | 133   | -1852         |
| chr17    | 9169474   | 9169673   | 6530411M01Rik | -15.0          | 4         | 1         | 201   | -1453         |
| chr16    | 4884877   | 4884922   | Mgrn1         | -10.7          | 4         | 1         | 47    | -1178         |
| chr4     | 150926524 | 150926858 | Tnfrsf9       | -10.6          | 12        | 1         | 336   | -1141         |
| chr16    | 30284052  | 30284285  | Lrrc15        | -10.3          | 10        | 2         | 235   | -799          |
| chr10    | 129188093 | 129188143 | Olf773        | -14.2          | 3         | 1         | 52    | -675          |
| chr19    | 37684614  | 37685105  | Cyp26c1       | -11.7          | 6         | 1         | 493   | -575          |
| chr4     | 142017165 | 142017345 | 4930455G09Rik | -19.4          | 4         | 2         | 182   | -553          |
| chr3     | 89365583  | 89365751  | Dcst1         | -10.9          | 9         | 1         | 170   | -331          |
| chr5     | 134947017 | 134947141 | Cldn4         | -12.4          | 3         | 1         | 126   | -84           |
| chr11    | 67099211  | 67099742  | Mir6923       | -12.7          | 18        | 1         | 533   | -62           |
| chr10    | 18210942  | 18211067  | Ect2l         | -13.6          | 6         | 2         | 127   | -53           |
| chr13    | 95478680  | 95478750  | S100z         | -18.6          | 5         | 4         | 72    | -26           |
| chr7     | 126781195 | 126781466 | Tbx6          | -10.9          | 14        | 4         | 273   | -17           |
| chr10    | 25299043  | 25299293  | Akap7         | -14.8          | 15        | 9         | 252   | 0             |
| chr11    | 117782283 | 117782448 | Tmc8          | -12.5          | 4         | 1         | 167   | 0             |
| chr5     | 115185637 | 115186377 | Cabp1         | -12.1          | 12        | 2         | 742   | 0             |
| chr2     | 38714145  | 38714543  | Nr5a1         | -11.5          | 9         | 1         | 400   | 0             |
| chr14    | 54625492  | 54626142  | Psmb11        | -13.0          | 13        | 1         | 652   | 183           |
| chr3     | 130617813 | 130617982 | Etnppl        | -12.7          | 5         | 2         | 171   | 239           |
| chr5     | 123510995 | 123511206 | B3gnt4        | -18.3          | 14        | 8         | 213   | 536           |
| chr17    | 36461236  | 36461329  | H2-M10.4      | -10.2          | 3         | 1         | 95    | 1000          |
| chr11    | 102886252 | 102886393 | Fam187a       | -10.7          | 7         | 1         | 143   | 1084          |
| chr7     | 126948340 | 126948421 | Asphd1        | -11.9          | 5         | 1         | 83    | 1160          |
| chr6     | 116651899 | 116652122 | 8430408G22Rik | -11.6          | 7         | 2         | 225   | 1216          |
| chr16    | 89959140  | 89959380  | Tiam1         | -13.1          | 4         | 1         | 242   | 1447          |
| chr1     | 74793489  | 74793551  | Wnt10a        | -15.0          | 4         | 1         | 64    | 1471          |
| chr11    | 70617511  | 70617606  | Chrne         | -19.8          | 4         | 2         | 97    | 1588          |
| chr10    | 81498488  | 81498512  | S1pr4         | -11.5          | 3         | 1         | 26    | 1625          |
| chr9     | 107677133 | 107677816 | Gnat1         | -11.9          | 11        | 4         | 685   | 1776          |
| chr2     | 89787381  | 89787517  | Olf1254       | -10.3          | 4         | 1         | 138   | 1833          |
| HyperDMC |           |           |               |                |           |           |       |               |
| chr3     | 95144314  | 95144382  | Tnfaip8l2     | 12.9           | 4         | 1         | 70    | -1955         |
| chr5     | 142959769 | 142959892 | Fscn1         | 11.1           | 8         | 2         | 125   | -463          |
| chr1     | 131743974 | 131744203 | Slc26a9       | 11.8           | 5         | 1         | 231   | 0             |
| chr4     | 97581962  | 97582054  | Nfia          | 10.4           | 5         | 1         | 94    | 20            |
| chr3     | 129754871 | 129755005 | Egf           | 10.8           | 8         | 3         | 136   | 317           |
| chr10    | 116986745 | 116986822 | Best3         | 12.2           | 3         | 1         | 79    | 432           |
| chr13    | 5862640   | 5862853   | Klf6          | 10.4           | 3         | 1         | 215   | 1152          |
| chr4     | 117128161 | 117128279 | Tctex1d4      | 10.2           | 5         | 2         | 120   | 1349          |
| chr9     | 44879591  | 44879909  | Kmt2a         | 13.2           | 4         | 1         | 320   | 1365          |
