# Supplementary material for: Gestational arsenic exposure induces site-specific DNA hypomethylation in active retrotransposon subfamilies in offspring sperm in mice
Source: PubMed Central journal article supplement (PMC7709384; doi:10.1186/s13072-020-00375-3), 2020-12-02

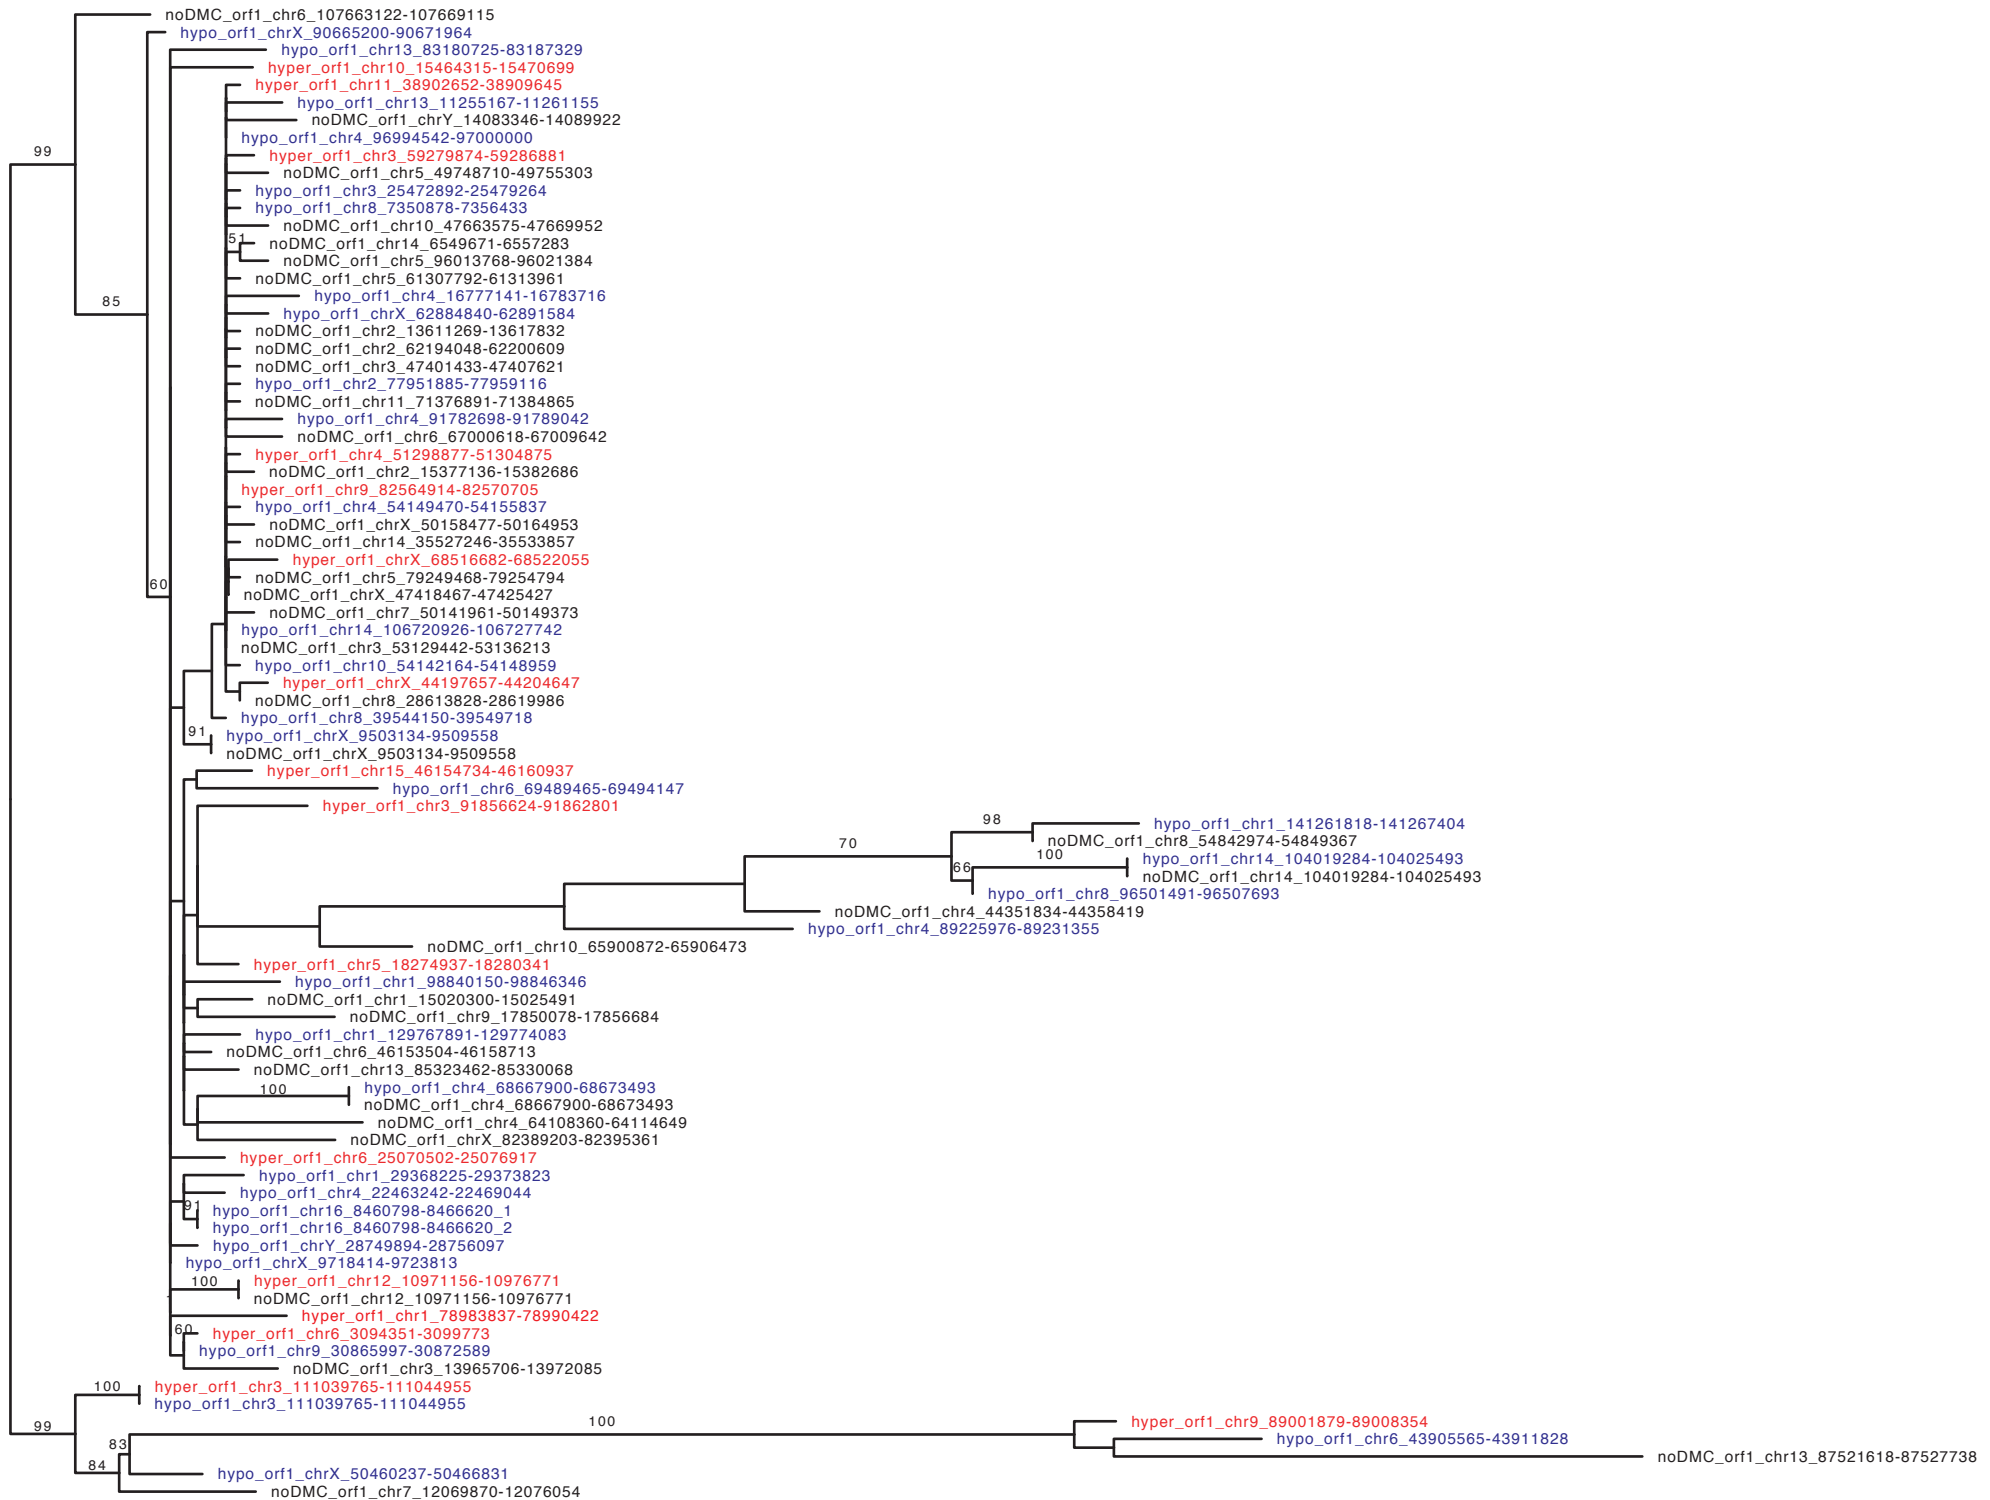

Supplement: 13072_2020_375_MOESM3_ESM.pdf [file 13072_2020_375_MOESM3_ESM.pdf]
